# PSYCHIATRIC SERVICES

A Journal of the  
American Psychiatric  
Association

- ◆ LA's HOPE Demonstration:  
Housing and Work Supports  
for Homeless Adult Clients
- ◆ Specialized Cardiac Care  
and Obesity-Related Care:  
Two Studies of Service Use
- ◆ Community Violence and  
Alcohol Use by Persons  
With Psychiatric Disorders
- ◆ Asserting Prisoners' Right  
to Health and Health Care:  
U.K. and U.S. Perspectives

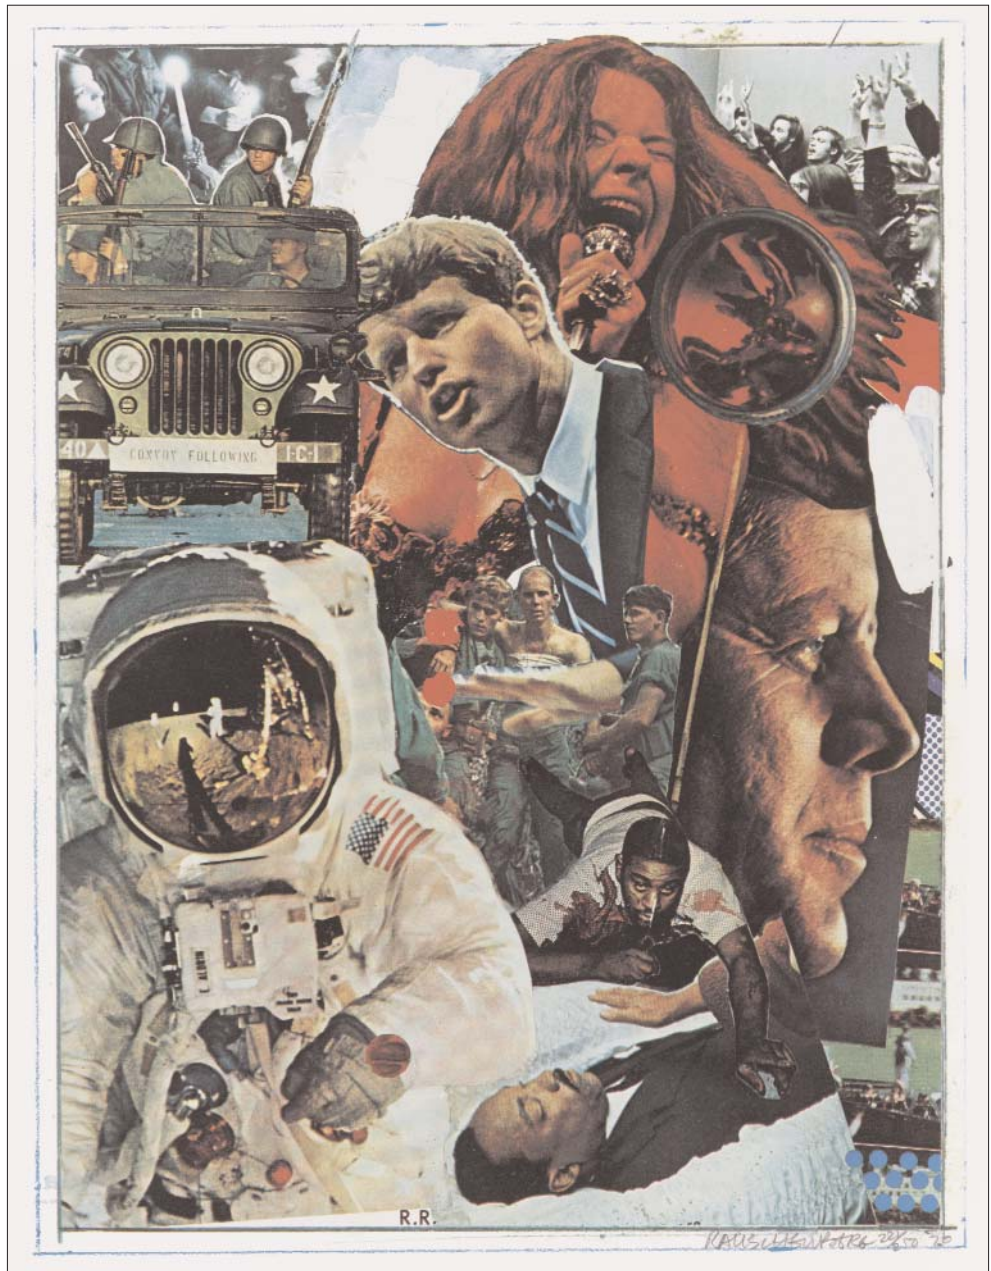

Source: http://ps.psychiatryonline.org/doi/suppl/10.1176/ps.2012.63.issue-3/suppl_file/cover.pdf
